# Supplementary material for: Transcriptional reprogramming from innate immune functions to a pro-thrombotic signature by monocytes in COVID-19
Source: Springer Nature journal article supplement (doi:10.1038/s41467-022-35638-y), 2022-12-26
Supplement: MOESM1 [file 41467_2022_35638_MOESM1_ESM.pdf]

## **Transcriptional reprogramming from innate immune functions to a pro-thrombotic signature by monocytes in COVID-19**

Allison K. Maher<sup>1</sup>, Katie L. Burnham<sup>2</sup>, Emma M Jones<sup>1</sup>, Michelle M. H. Tan<sup>3</sup>, Rocel C. Saputil<sup>3</sup>, Laury Baillon<sup>1</sup>, Claudia Selck<sup>1</sup>, Nicolas Giang<sup>1</sup>, Rafael Argüello<sup>4</sup>, Clio Pillay<sup>3</sup>, Emma Thorley<sup>3</sup>, Charlotte-Eve Short<sup>1</sup>, Rachael Quinlan<sup>1</sup>, Wendy S. Barclay<sup>1</sup>, Nichola Cooper<sup>3</sup>, Graham P. Taylor<sup>1</sup>, Emma E. Davenport<sup>2</sup>, Margarita Dominguez-Villar<sup>1,\*</sup>.

<sup>1</sup>Department of Infectious Diseases, Faculty of Medicine, Imperial College London, London, UK, <sup>2</sup>Wellcome Sanger Institute, Wellcome Genome Campus, Hinxton, Cambridge, UK, <sup>3</sup>Department of Immunology and Inflammation, Faculty of Medicine, Imperial College London, UK, <sup>4</sup>Aix Marseille Université, CNRS, INSERM, Centre d'Immunologie de Marseille-Luminy, Marseille, France.

\* correspondence to [m.dominguez-villar@imperial.ac.uk](mailto:m.dominguez-villar@imperial.ac.uk)

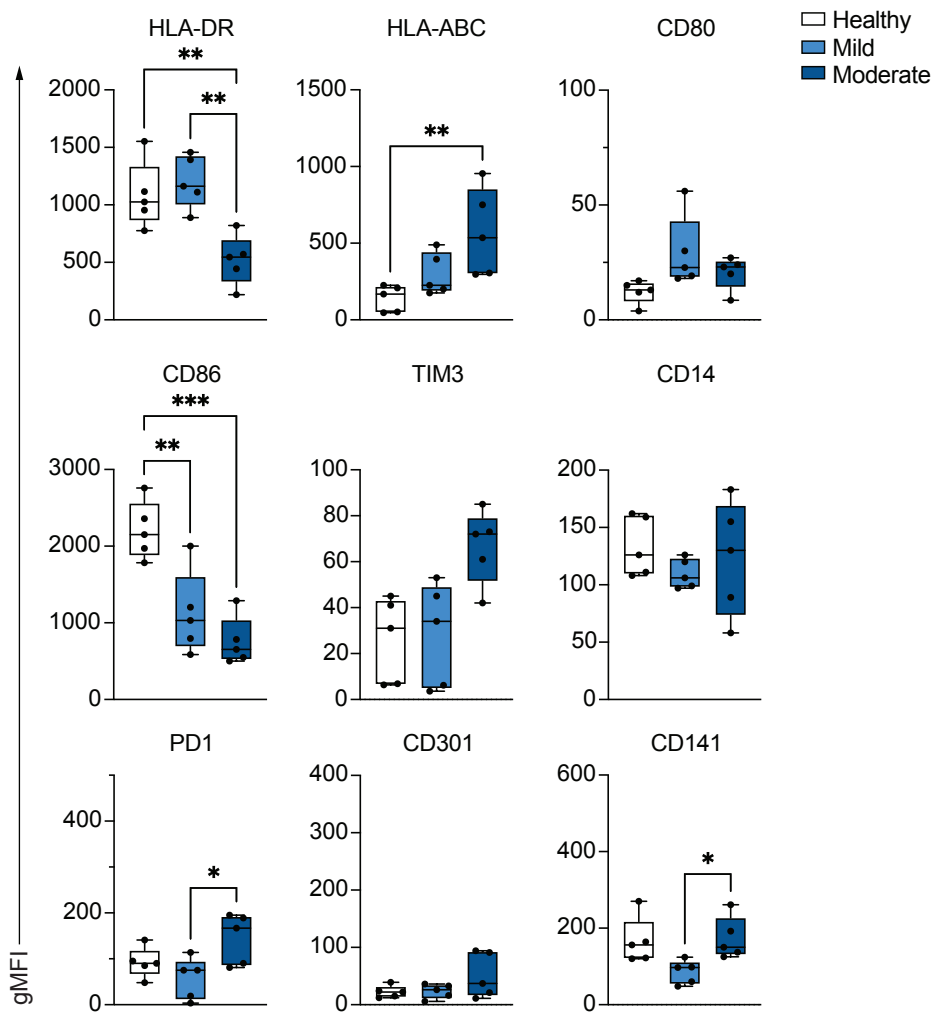

**Supplementary Figure 1. Monocyte phenotype in a second cohort of individuals.** Box and whiskers plots summarizing the median gMFI of each of the cell surface receptors analyzed (horizontal line inside boxes) in a second cohort of healthy individuals, mild and moderate COVID-19 patients (n=5 participants per group). The box extends from the 25<sup>th</sup> to the 75<sup>th</sup> percentile and the whiskers are drawn down to the minimum and up to the maximum gMFI value obtained in each group. One-way ANOVA with Tukey's correction for multiple comparisons. \*p<0.05, \*\*p<0.005, \*\*\*p<0.001.

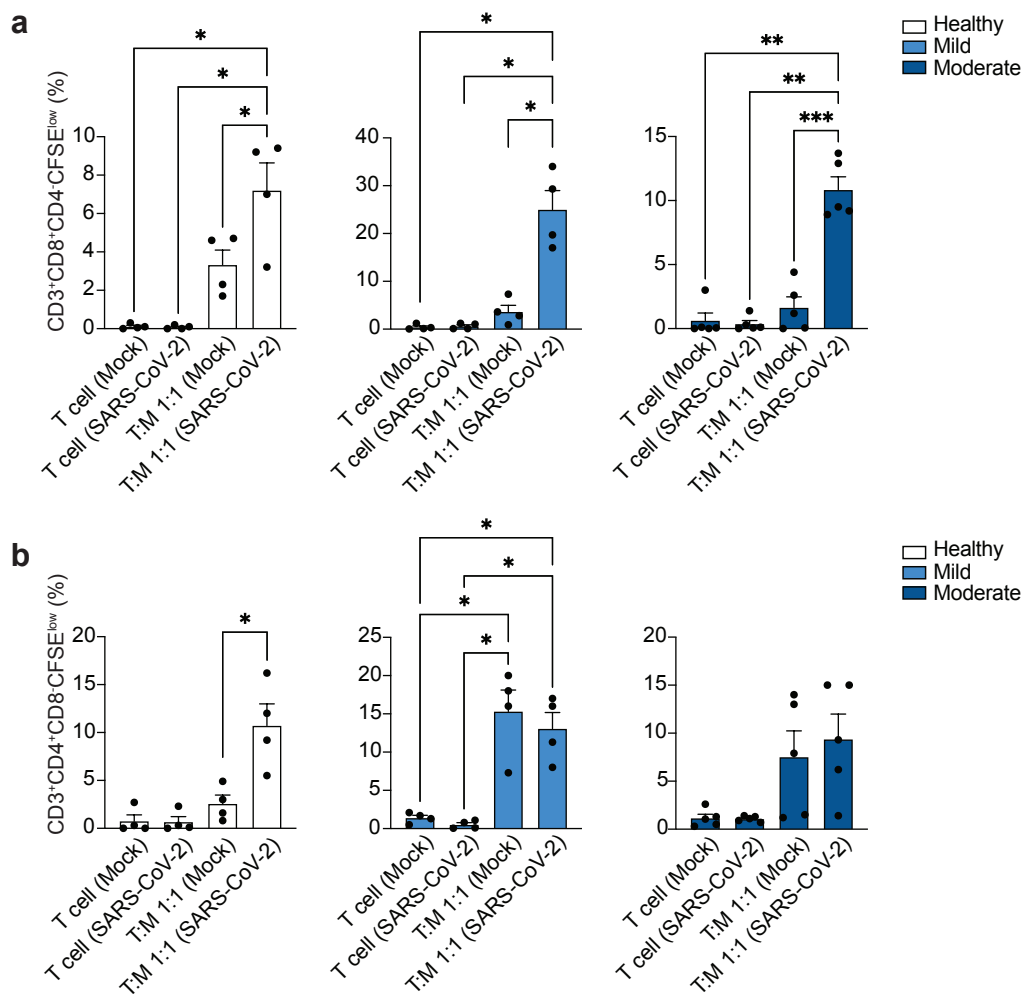

**Supplementary Figure 2. CD14<sup>+</sup> monocytes from COVID-19 patients effectively activate virus-specific CD8<sup>+</sup> T cells, but not CD4<sup>+</sup> T cells.** *Ex vivo* isolated CD14<sup>+</sup> monocytes from healthy individuals (white bars, n=4), mild (light blue, n=4) and moderate COVID-19 patients (dark blue, n=5) were loaded with UV-inactivated SARS-CoV-2 or vehicle (mock) and co-cultured with CFSE-labeled CD3<sup>+</sup> T cells at a 1:1 monocyte:T cell ratio for 10 days. Isolated T cells incubated with mock or UV-inactivated SARS-CoV-2 served as negative controls for proliferation. Bar plots represent the summary of the percentage of SARS-CoV-2-specific CD8<sup>+</sup> (a) and CD4<sup>+</sup> (b) T cells measured by CFSE dilution and shown as mean+s.e.m. One-way ANOVA with Tukey's correction for multiple comparisons. \*p<0.05, \*\*p<0.005, \*\*\*p<0.001.

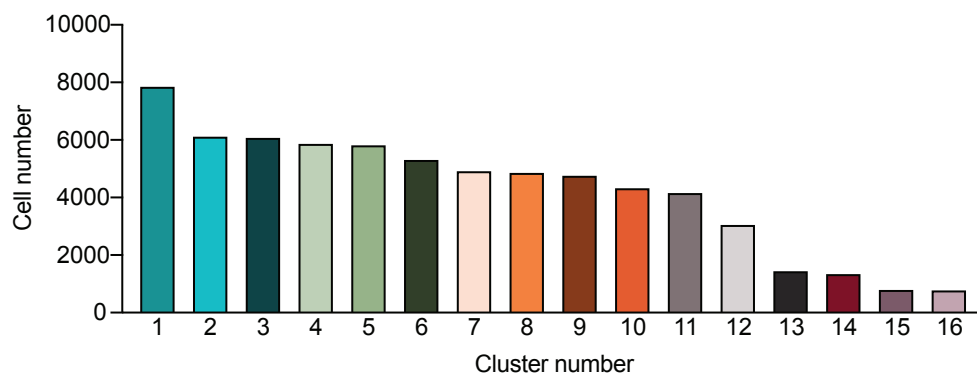

**Supplementary Figure 3. Number of cells per cluster identified by Phenograph.** Each bar represents the number of cells that each cluster (x axis) contains.

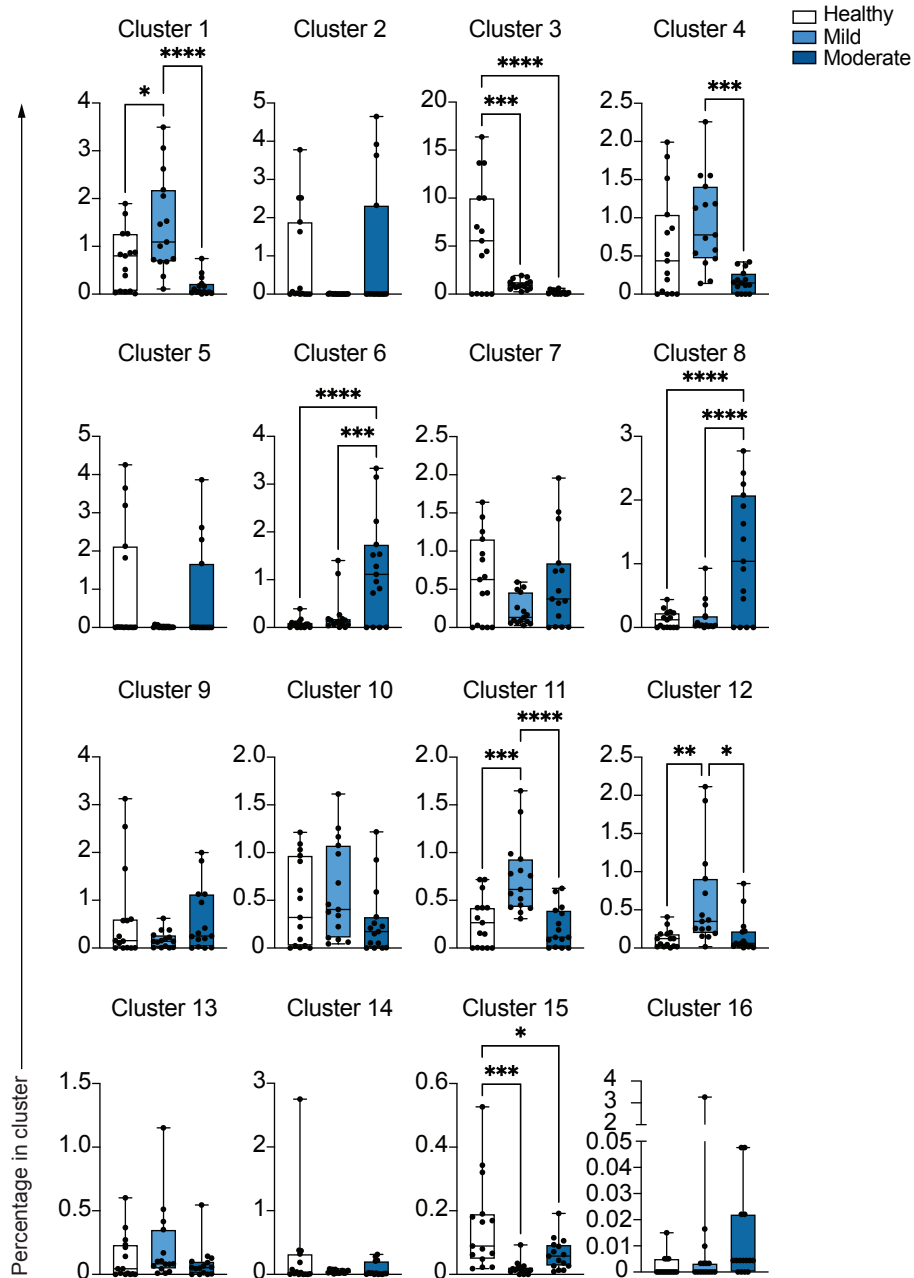

**Supplementary Figure 4. Percentage of CD14<sup>+</sup> monocytes from each clinical group in each Phenograph cluster.** Each dot represents an individual, grouped into healthy individuals (white), mild (light blue) and moderate (dark blue) COVID-19 patients (n=15 individuals per group). The boxes extend from the 25<sup>th</sup> to the 75<sup>th</sup> percentile and the whiskers are drawn down to the minimum and up to the maximum gMFI values obtained in each group. The horizontal line within each whisker represents the median. One-way ANOVA with Tukey's correction for multiple comparisons. \*p<0.05, \*\*p<0.005, \*\*\*p<0.001, \*\*\*\*p<0.0005.

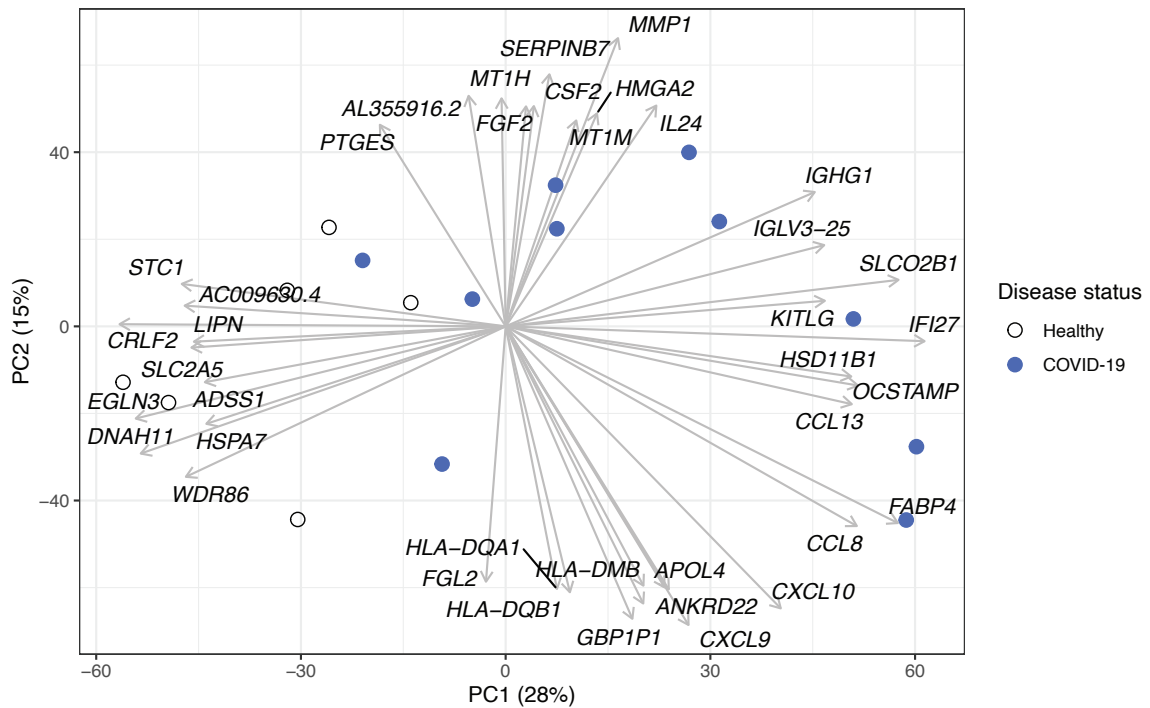

**Supplementary Figure 5. Principal Component Analysis (PCA) gene loadings for RNA-seq of *ex vivo* isolated CD14<sup>+</sup> monocytes from healthy individuals and moderate COVID-19 patients.** The features contributing the most to PC1 and PC2 both positively and negatively were identified for healthy individuals (white dots) and COVID-19 patients (blue dots) using gene loadings. The top 10 features for each PC are indicated, with arrows drawn from the origin illustrating their relative weights.

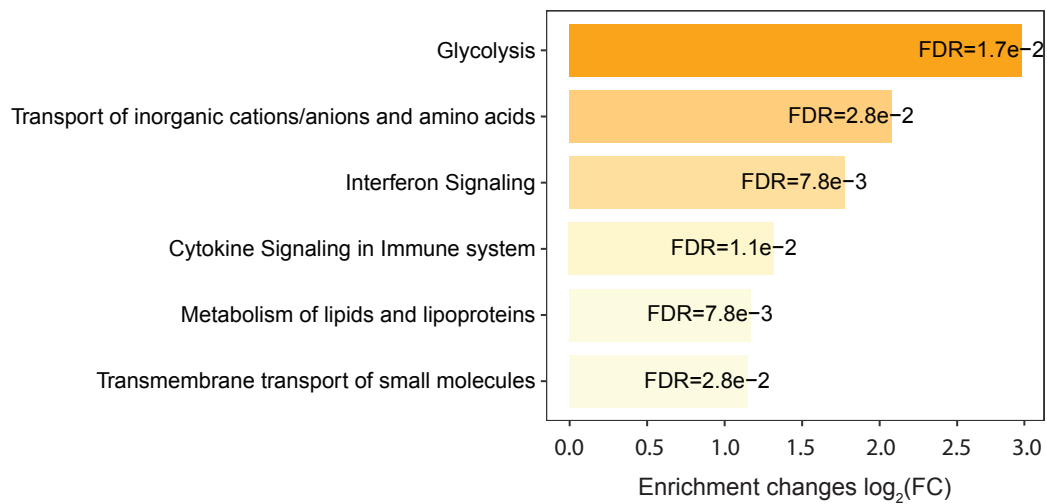

**Supplementary Figure 6. Pathway enrichment of COVID-19 monocyte RNA-seq data.** Significantly enriched (FDR <0.05) pathways from Reactome for the *ex vivo* COVID-19 vs. healthy control monocytes differentially expressed genes are displayed as a bar plot, with the fold enrichment plotted on the x axis ( $\log_2(\text{FC})$ ) and the bars labeled with the adjusted p value, calculated using Fisher's exact test .

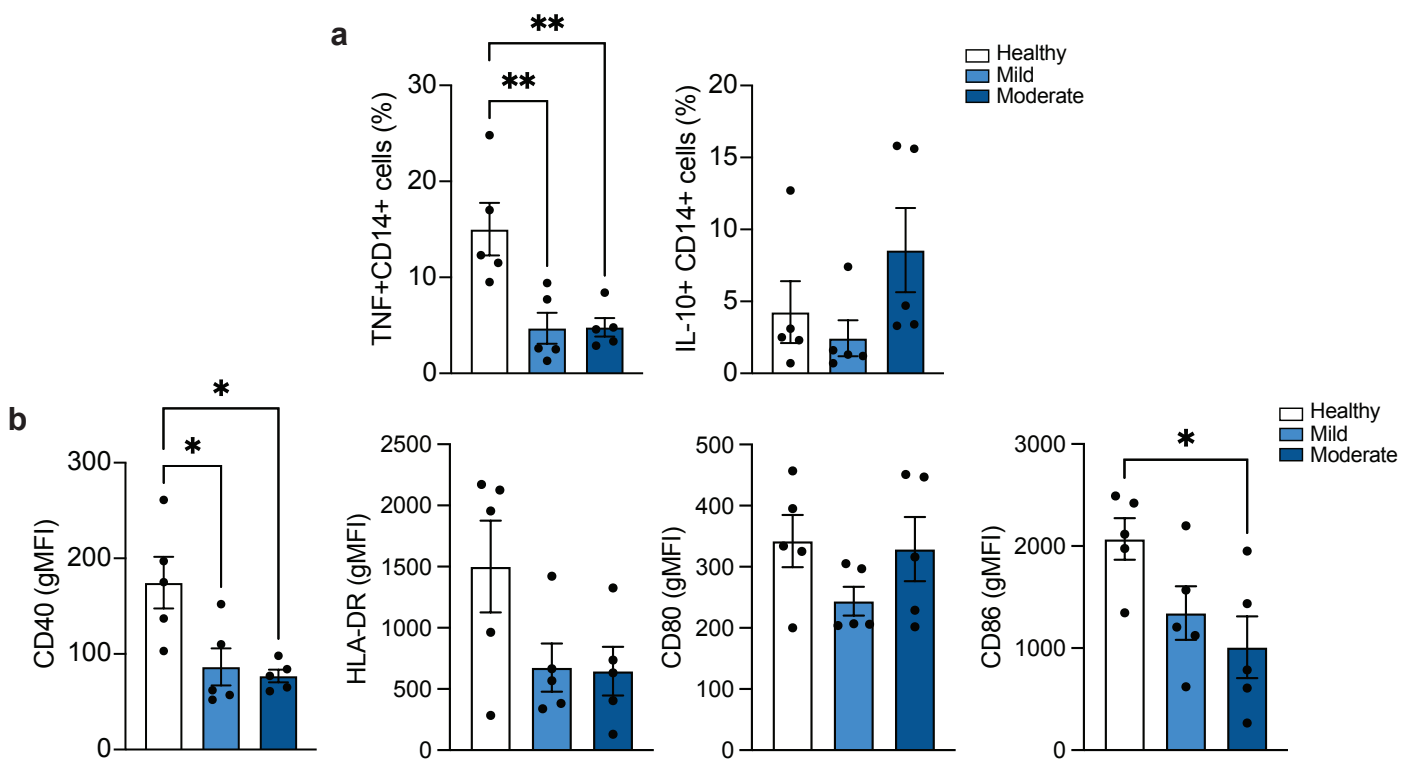

**Supplementary Figure 7. Impaired ex vivo pathogen sensing by isolated monocytes in COVID-19.** CD14<sup>+</sup> cells were isolated from total PBMC of healthy individuals (white bars, n=5), mild (light blue bars, n=5) and moderate (dark blue bars, n=5) COVID-19 patients by magnetic sorting and stimulated with UV-inactivated SARS-CoV-2 as in Figure 3. **a.** Bar plots show the summary of percentage of TNF- and IL-10-secreting monocytes in each participant group. **b.** Bar plots represent the summary of HLA-DR, CD40, CD80 and CD86 protein expression (gMFI) in each participant group. Data represented as mean +s.e.m. One-way ANOVA with Tukey's correction for multiple comparisons. \*p<0.05, \*\*p<0.005.



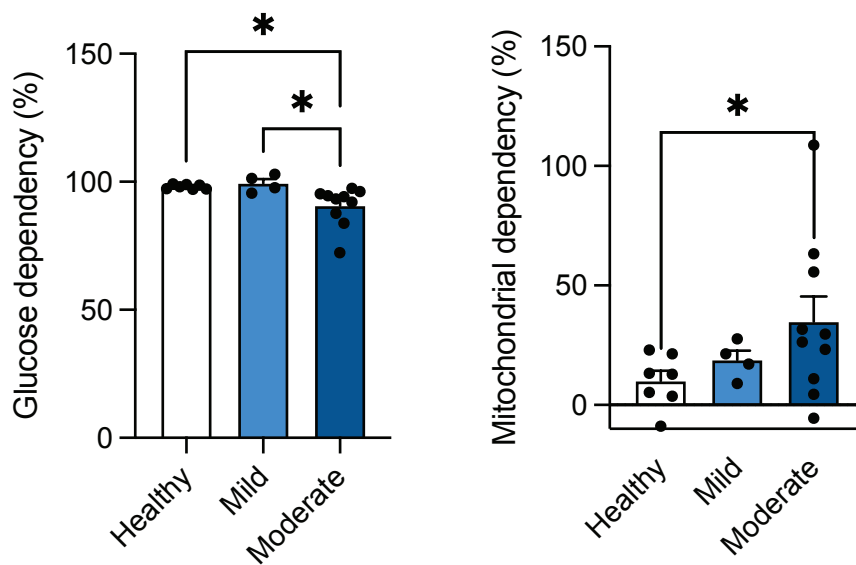

**Supplementary Figure 8. Monocyte glucose metabolism and mitochondrial oxidation dependency after LPS stimulation.** Glucose dependency and mitochondrial oxidation dependency determined using SCENITH™ in healthy individuals (n=7, white bar), mild (n=4, light blue bar) and moderate (n=9 for glucose dependency and n=10 for mitochondrial dependency, dark blue bar) COVID-19 monocytes after a 18 hour stimulation with 100 ng/ml LPS. Bar plots represent the mean+s.e.m. One-way ANOVA with Tukey's correction for multiple comparisons. \*p<0.05.

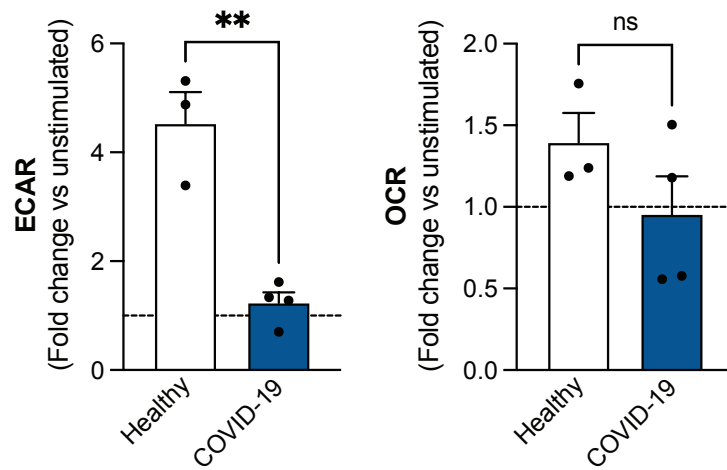

**Supplementary Figure 9. Seahorse analysis of activated COVID-19 monocytes.** Extracellular acidification rate (ECAR) and oxygen consumption rate (OCR) were measured in sorted CD14<sup>+</sup> monocytes from healthy individuals (n=3) and COVID-19 patients (n=4) stimulated or not with 100 ng/ml LPS for 18 hours, shown as mean+s.e.m.. ECAR and OCR shown as fold increase relative to unstimulated controls \*\*p<0.005 by unpaired, two-tailed t-test.

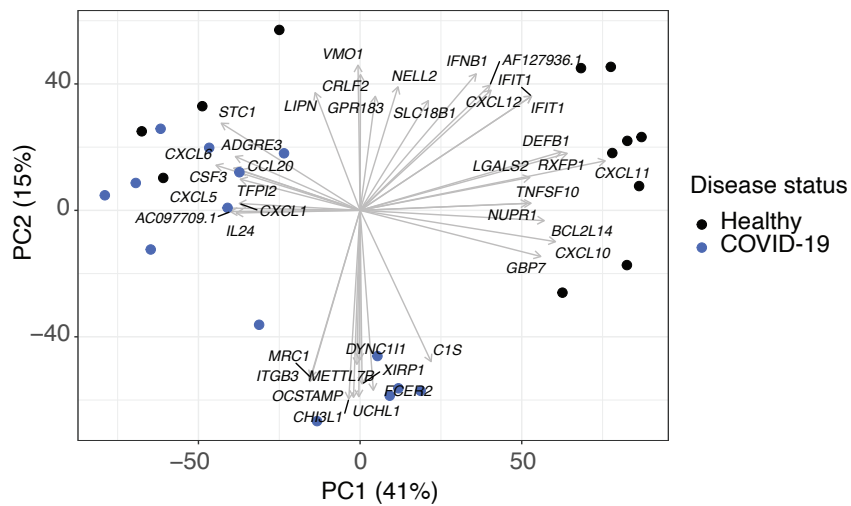

**Supplementary Figure 10. Principal Component Analysis (PCA) gene loadings for RNA-seq of SARS-CoV-2-stimulated CD14<sup>+</sup> monocytes from healthy individuals and moderate COVID-19 patients.** The features contributing the most to PC1 and PC2 (both positively and negatively) were identified using gene loadings, and the top 10 features for each PC are indicated, with arrows drawn from the origin illustrating their relative weights.

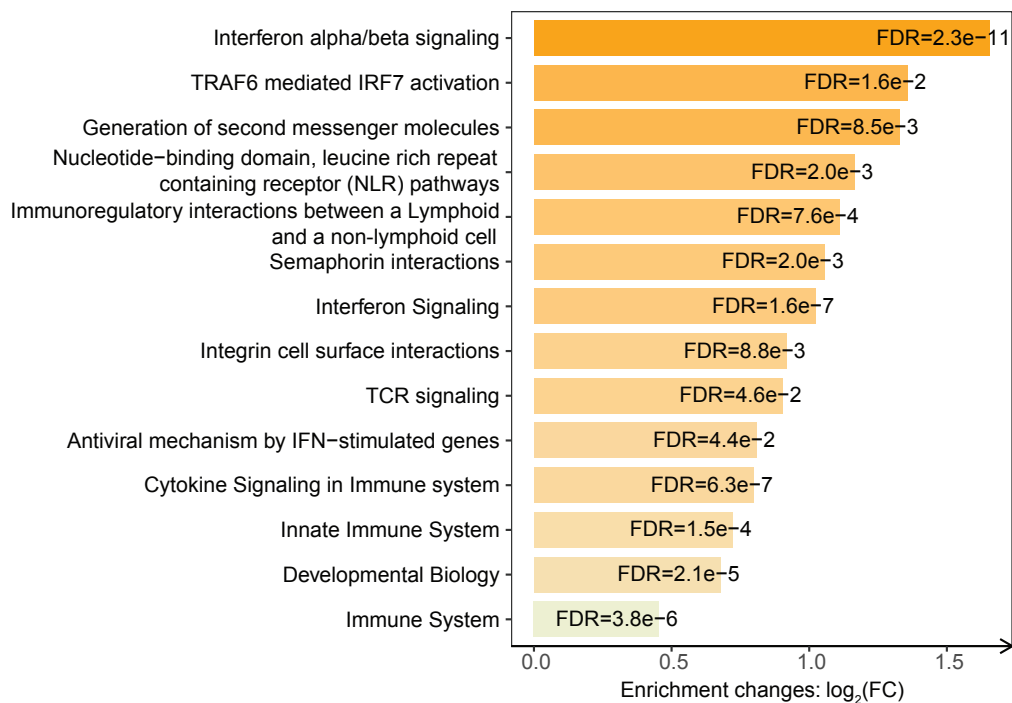

**Supplementary Figure 11. Pathway enrichment of SARS-CoV-2-stimulated COVID-19 monocyte RNA-seq data.** Significantly enriched (FDR <0.05) pathways from Reactome for SARS-CoV-2-stimulated COVID-19 vs. healthy control monocytes differentially expressed genes are displayed as a bar plot, with the fold enrichment plotted on the x axis ( $\log_2(\text{FC})$ ) and the bars labeled with the adjusted p value, calculated using Fisher's exact test.

**a** Transmembrane transport of small molecules

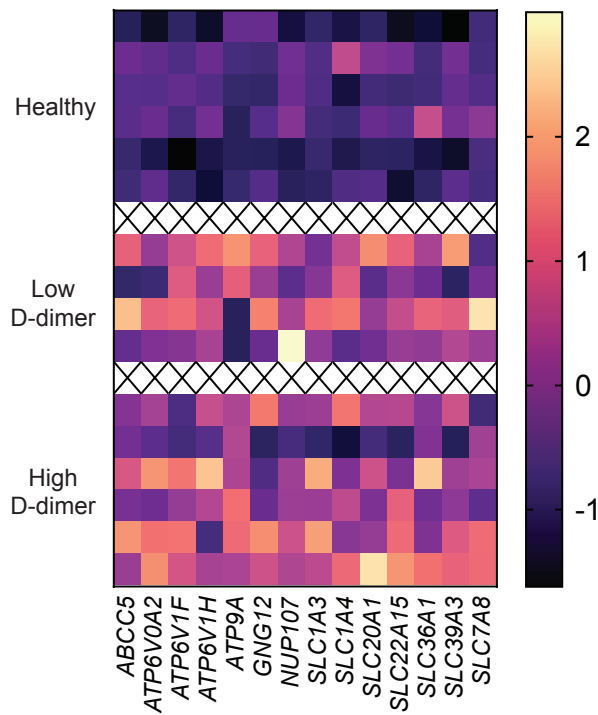

**b**

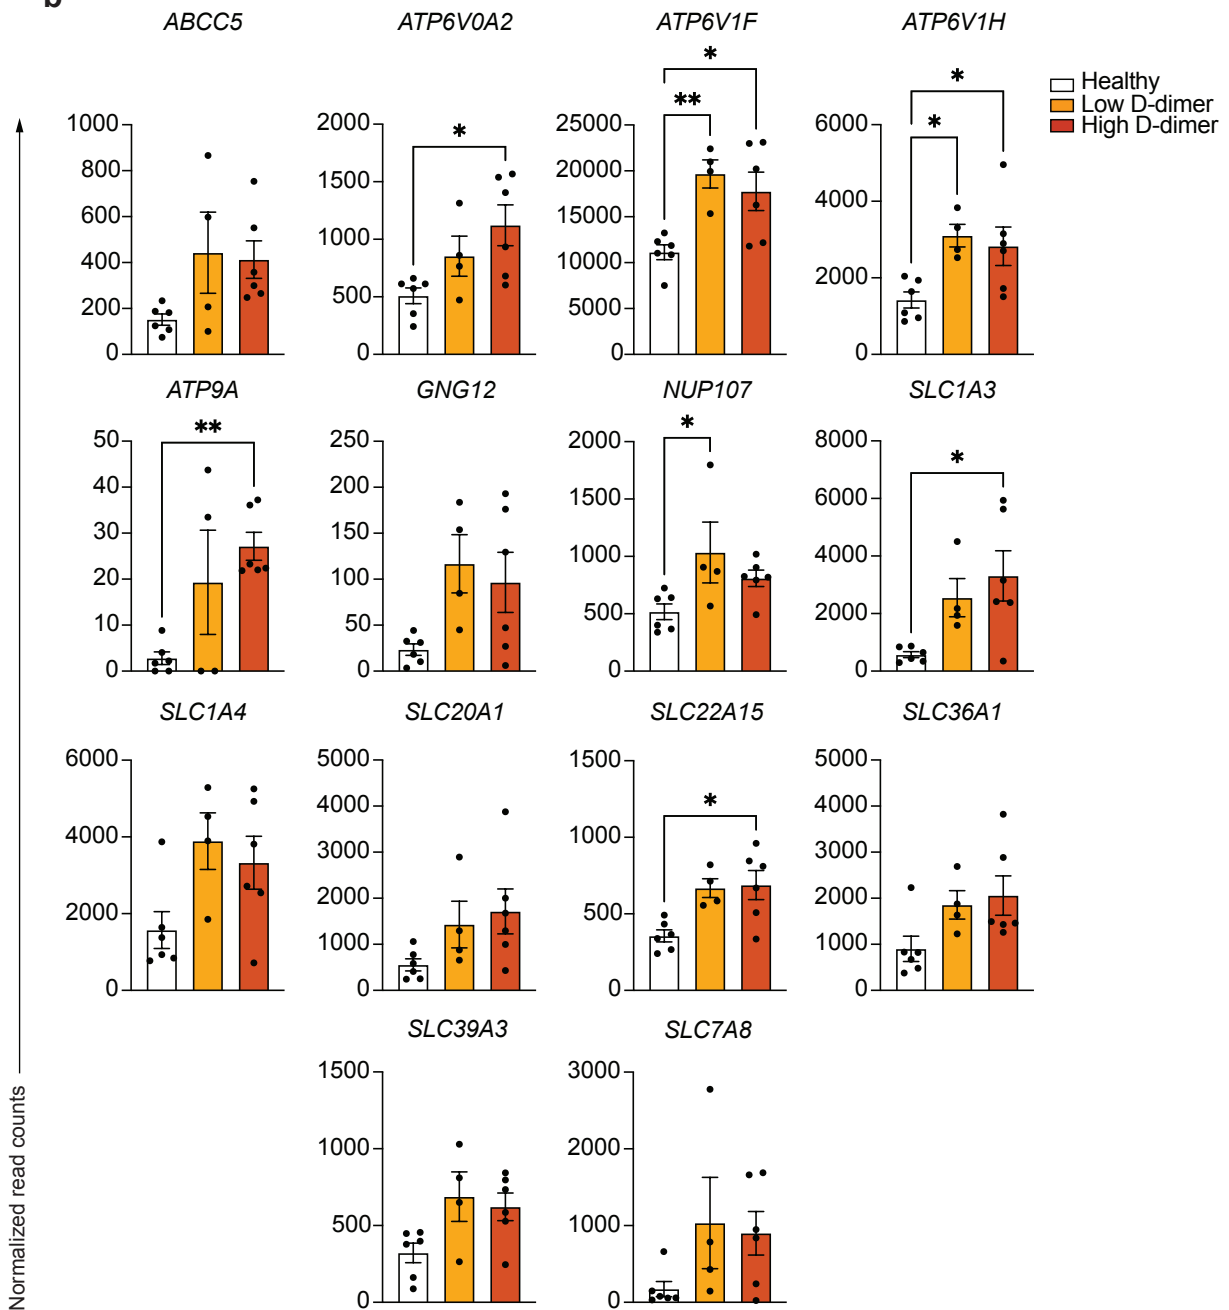

**Supplementary Figure 12. High plasma D-dimer concentration is associated with increased expression of hemostasis-related pathways in *ex vivo* monocyte RNA-seq data.** RNA-seq data from *ex vivo* isolated monocytes from moderate COVID-19 patients were grouped into low and high plasma D-dimer concentrations. **a.** Heatmap of z-score-transformed normalized read counts of significantly upregulated genes in “Transmembrane transport of small molecules” pathway in healthy (n=6), low D-dimer concentration (n=4) and high D-dimer concentration (n=6) moderate COVID-19 monocytes. Gene expression values are scaled by column, and each row represents one individual. **b.** Bar plots show the summary of normalized gene counts of the genes in **a**, shown as mean+s.e.m. One-way ANOVA with Tukey’s correction for multiple comparisons for **b**. \*p<0.05, \*\*p<0.005.

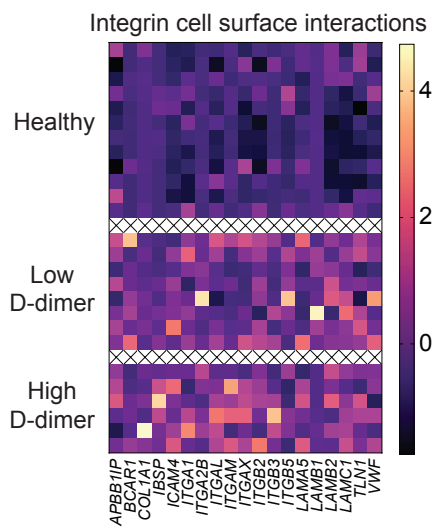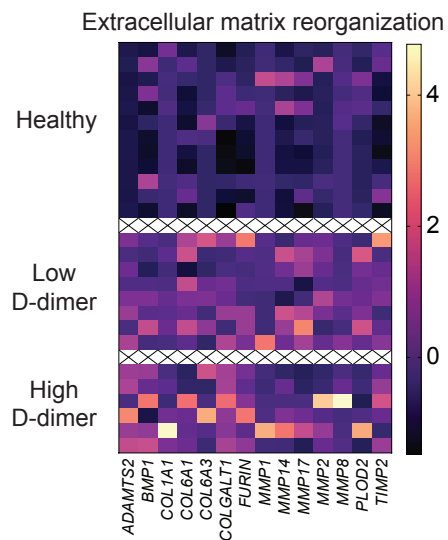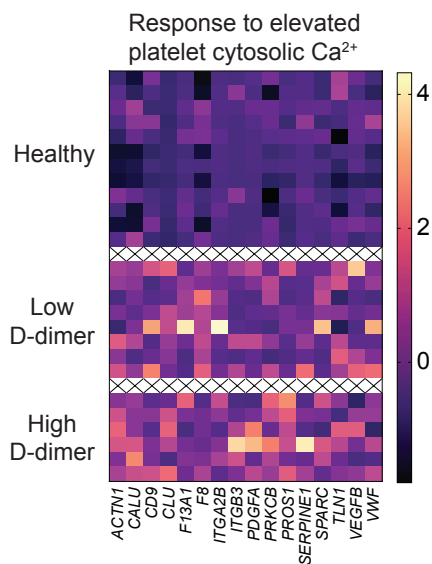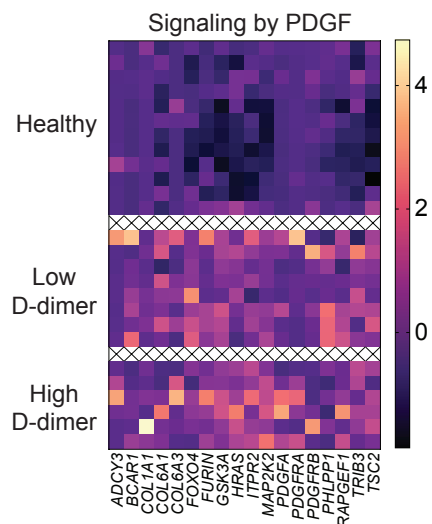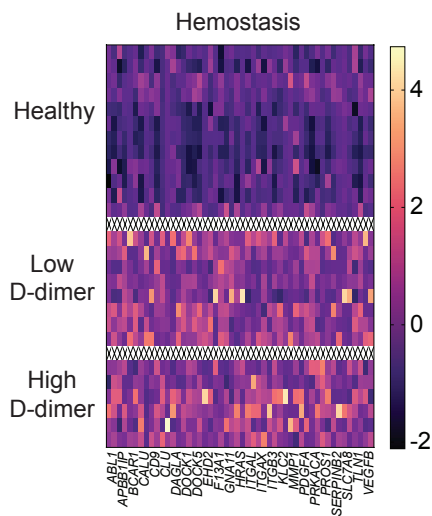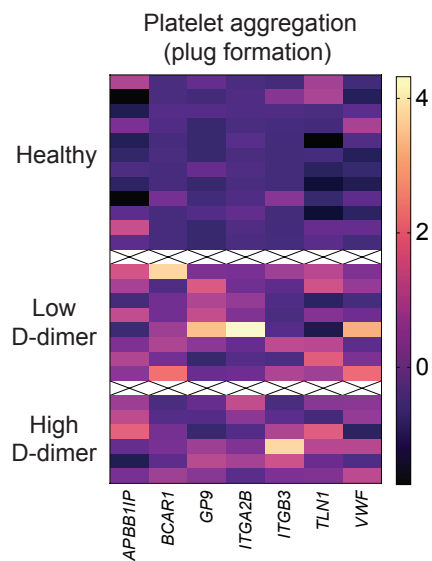

**Supplementary Figure 13. Secondary SARS-CoV-2 stimulation increases the expression of pro-thrombotic genes in a D-dimer concentration independent manner.** RNA-seq datasets from SARS-CoV-2-stimulated monocytes from moderate COVID-19 patients were grouped into low and high plasma D-dimer concentrations. Heatmap of z-score-transformed normalized read counts of significantly upregulated genes in “Integrin cell surface interactions”, “Extracellular matrix organization”, “Response to elevated platelet cytosolic Ca<sup>2+</sup>”, “Signaling by PDGF”, “Hemostasis” and “Platelet aggregation (plug formation)” pathways in healthy (n=12), low D-dimer concentration (n=8) and high D-dimer concentration (n=6) moderate COVID-19 monocytes. Gene expression values are scaled by column, and each row represents one individual.



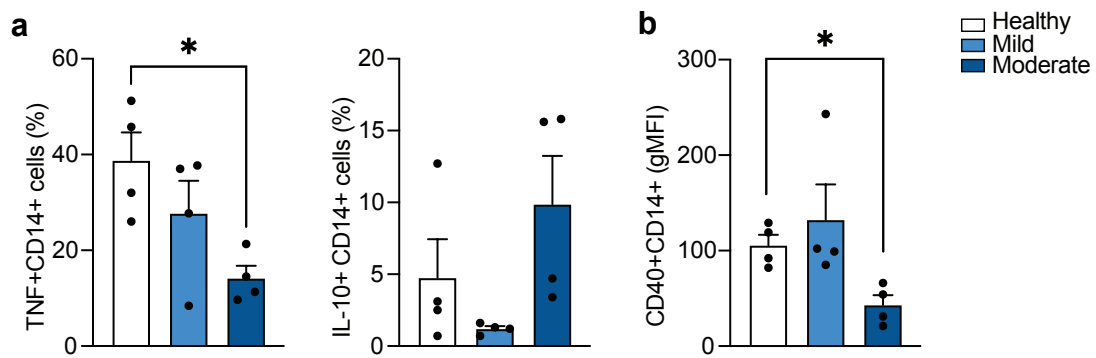

**Supplementary Figure 14. Isolated monocytes from moderate COVID-19 patients are hyporesponsive upon secondary LPS stimulation.** Monocytes from healthy individuals, mild and moderate COVID-19 patients (n=4 individuals per group) were isolated by CD14 positive magnetic selection and stimulated with 100 ng/ml LPS for 20 hours. **a.** Bar plots show the summary of percentage of TNF- and IL-10-producing CD14<sup>+</sup> cells measured by flow cytometry and presented as mean+s.e.m. **b.** Bar plot shows the summary of CD40 expression measured by flow cytometry and plotted as gMFI of CD14<sup>+</sup> cells (mean+s.e.m.). One-way ANOVA with Tukey's correction for multiples comparisons in **a** and **b.** \*p<0.05, \*\*p<0.005.

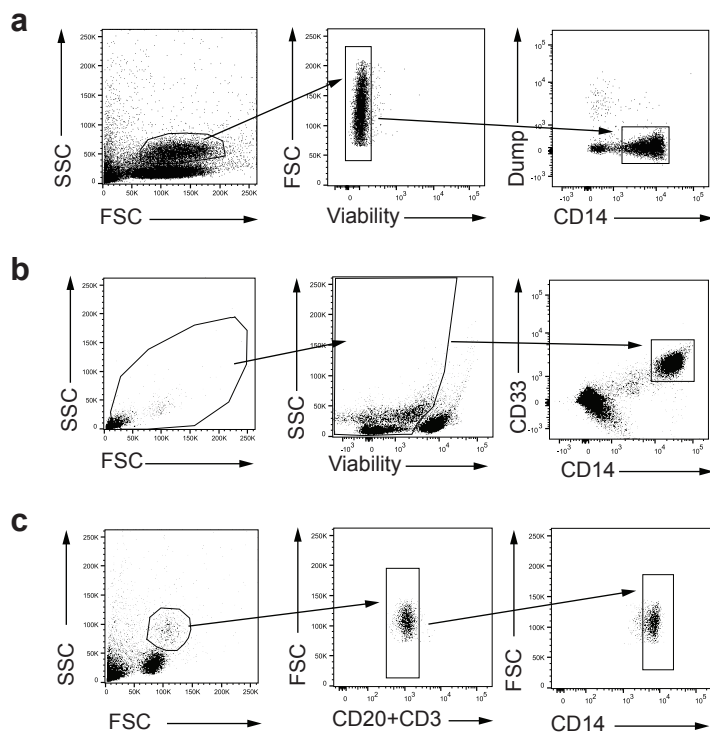

**Supplementary Figure 15. Gating strategy for flow cytometry data.** **a.** Gating strategy for figures 1a-b, 3c-d, 4a-i and monocyte sort for RNA-seq. Dump channel comprises antibodies to CD3, CD19, CD66b, CD16, and CD56. Gating strategy for figures 6a-c. **c.** Gating strategy for figures 2e-f, 2h-k, 5g, 5i.

| Target                     | Fluorochrome    | Clone         | Brand                        | Catalog number | Dilution |
|----------------------------|-----------------|---------------|------------------------------|----------------|----------|
| CD14                       | Pacific Blue    | 61D3          | eBioscience                  | 48-0149-42     | 1:200    |
| CD14                       | APC             | M5E2          | Biolegend                    | 301812         | 1:200    |
| CD3                        | PerCP-Cy5.5     | UCHT1         | BD Biosciences               | 560835         | 1:200    |
| CD3                        | V450            | UCHT1         | BD Biosciences               | 560365         | 1:200    |
| CD1c                       | PE-Dazzle 594   | L161          | Biolegend                    | 331531         | 1:200    |
| CD86                       | APC             | BU63          | Biolegend                    | 374208         | 1:200    |
| CD80                       | FITC            | BB1           | BD Pharmigen                 | 555683         | 1:200    |
| HLA-DR                     | APC-H7          | L243          | Biolegend                    | 307617         | 1:200    |
| CD301                      | PE              | H037G3        | Biolegend                    | 354703         | 1:200    |
| HLA-ABC                    | BV510           | W6/32         | Biolegend                    | 311435         | 1:200    |
| TIM3                       | SB702           | F38-2E2       | Invitrogen                   | 67-3109-42     | 1:200    |
| CD19                       | PerCP-Cy5.5     | HIB19         | BD Biosciences               | 561295         | 1:200    |
| PD1                        | PE-Cy7          | EH12.2H7      | Biolegend                    | 329917         | 1:200    |
| CD16                       | AF700           | 3G8           | BD                           | 557920         | 1:200    |
| CD16                       | PerCP-Cy5.5     | B73.1         | Biolegend                    | 360712         | 1:200    |
| CD141                      | BV785           | M80           | Biolegend                    | 344115         | 1:200    |
| CD40                       | Alexa Fluor 700 | 5C3           | Biolegend                    | 334328         | 1:200    |
| TNF                        | BV510           | Mab11         | Biolegend                    | 502950         | 1:200    |
| IL-10                      | BV412           | JES3-907      | ThermoFisher Scientific      | 48-7108-42     | 1:200    |
| Puromycin                  | APC             | R4743L-E8     | Gift from Dr Rafael Argüello | N/A            | 1:600    |
| CD41                       | PE              | HIP8          | Biolegend                    | 303706         | 1:100    |
| CD33                       | APC             |               | BD Biosciences               | 340474         | 1:200    |
| CD20                       | PerCP-Cy5.5     | H1            | BD Biosciences               | 558021         | 1:200    |
| Phosphor-IRF3 (Ser 396)    | AF488           | Polyclonal    | Bioss                        | bs-3195R-A488  | 1:666    |
| Phospho-NFkB p65 (Ser 529) | PE-Cy7          | K10-895.12.50 | BD Biosciences               | 6273506        | 1:50     |
| IkBa                       | PE              | 3D6C02        | Biolegend                    | 662412         | 1:200    |
| CD4                        | PE-Dazzle 594   | RPA-T4        | Biolegend                    | 300548         | 1:200    |
| CD4                        | BV605           | RPA-T4        | Biolegend                    | 300555         | 1:200    |
| CD4                        | FITC            | RPA-T4        | Biolegend                    | 300506         | 1:200    |
| CD8                        | PE-Dazzle 594   | RPA-T8        | Biolegend                    | 301058         | 1:200    |
| CD56                       | PerCP-Cy5.5     | 5.1H11        | Biolegend                    | 362526         | 1:200    |
| CD66b                      | PerCP-Cy5.5     | QA17A51       | Biolegend                    | 396914         | 1:200    |

**Table 1. Antibodies used in the study.**
