# Supplementary material for: Transcriptional reprogramming from innate immune functions to a pro-thrombotic signature by monocytes in COVID-19
Source: Nat Commun. 2022 Dec 26;13:7947. doi: 10.1038/s41467-022-35638-y (PMC9791976; doi:10.1038/s41467-022-35638-y)
Supplement: Supplementary file 6 — Supplementary Dataset 2 [file 41467_2022_35638_MOESM6_ESM.xlsx]

## Sheet: Dataset 2
Supplementary Table 2 Percentage of cells per cluster in each study group
	Cluster#	Healthy	Mild	Moderate
	1	10.53	21.85	2.48
	2	12.59	0.06	14.52
	3	9.1	14.88	3
	4	9.48	14.11	2.48
	5	15.2	0.22	10.45
	6	1.22	3.89	18.51
	7	9.65	3.31	8.9
	8	1.91	2.38	17.32
	9	9.77	2.71	8.69
	10	6.06	8.97	4.2
	11	4.22	10.98	3.29
	12	1.85	9.19	2.56
	13	1.94	3.2	1.3
	14	4.17	0.66	1.16
	15	2.29	0.29	0.96
	16	0.02	3.3	0.18
