# Supplementary material for: Transcriptional reprogramming from innate immune functions to a pro-thrombotic signature by monocytes in COVID-19
Source: Nat Commun. 2022 Dec 26;13:7947. doi: 10.1038/s41467-022-35638-y (PMC9791976; doi:10.1038/s41467-022-35638-y)
Supplement: Supplementary file 7 — Supplementary Dataset 3 [file 41467_2022_35638_MOESM7_ESM.xlsx]

## Sheet: Dataset 3
Supplementary Table 3 - Pathway enrichment results of all DE genes from unstimulated COVID19 vs unstimulated healthy monocytes
name	nAnno	nOverlap	fc	zscore	pvalue	adjp	or	CIl	CIu	distance	namespace	members_Overlap	members_Anno
Interferon Signaling	141	16	2.76	4.36	0.00022	0.0078	3.05	1.68	5.19		C2	DDX58, FLNB, HERC5, IFI27, IFI6, IFITM2, IFITM3, IRF9, KPNA2, KPNA3, MX1, NCAM1, NUP107, OAS2, OAS3, USP18	AAAS, ADAR, ARIH1, B2M, CAMK2D, CD44, CIITA, DDX58, EGR1, EIF2AK2, EIF4A1, EIF4A2, EIF4A3, EIF4E, EIF4E2, EIF4E3, EIF4G1, EIF4G2, EIF4G3, FCGR1A, FCGR1B, FLNB, GBP1, GBP2, GBP4, GBP5, GBP6, GBP7, HERC5, HLA-A, HLA-B, HLA-C, HLA-DPA1, HLA-DPB1, HLA-DQA1, HLA-DQA2, HLA-DRB1, HLA-DRB5, HLA-F, HLA-G, HLA-K, ICAM1, IFI27, IFI35, IFI6, IFIT1, IFIT2, IFIT3, IFITM1, IFITM2, IFITM3, IFNA1, IFNA14, IFNA2, …
Metabolism of lipids and lipoproteins	362	29	1.95	3.8	0.00047	0.0078	2.09	1.36	3.09		C2	AKR1B1, ANKRD1, ARSB, ASAH1, CDK8, CYP27A1, DHCR24, ELOVL7, GPAT4, GPCPD1, GPD1L, HSD11B1, LGMN, ME1, MED27, MGLL, MTMR2, PCCB, PIK3CB, PIK3R4, PLD6, PRKAB2, SGPP1, SGPP2, SLC44A1, SPHK1, STARD5, TXNRD1, UGCG	A2M, ABCA1, ABCB4, ABCC3, ABCD1, ABCG1, ABHD5, ACAA1, ACACA, ACACB, ACADM, ACADS, ACADVL, ACAT1, ACER2, ACER3, ACHE, ACLY, ACOT8, ACOX1, ACOX2, ACOX3, ACSL1, ACSL3, ACSL4, ACSL5, ACSL6, AGPAT1, AGPAT2, AGPAT3, AGPAT4, AGPAT5, AGPS, AKR1B1, ALAS1, AMACR, ANGPTL4, ANKRD1, APOE, ARF1, ARF3, ARNTL, ARSA, ARSB, ARSG, ARSK, ASAH1, ASAH2, BDH1, BMP1, CAV1, CCNC, CD36, CDIPT, CDK19, CDK8, CDS1, CDS2, CEP…
Cytokine Signaling in Immune system	240	21	2.13	3.66	0.00091	0.011	2.29	1.38	3.62		C2	CBL, CHUK, DDX58, FLNB, HERC5, IFI27, IFI6, IFITM2, IFITM3, IL1RN, IRF9, KPNA2, KPNA3, MX1, NCAM1, NUP107, OAS2, OAS3, PIK3CB, USP18, YES1	AAAS, ADAM17, ADAR, ARIH1, B2M, BLNK, BTRC, CAMK2D, CASP1, CBL, CD44, CDK1, CHUK, CIITA, CISH, CRK, CRKL, CSF2, CSF2RA, CSF2RB, CUL1, DDX58, EGR1, EIF2AK2, EIF4A1, EIF4A2, EIF4A3, EIF4E, EIF4E2, EIF4E3, EIF4G1, EIF4G2, EIF4G3, FCGR1A, FCGR1B, FLNB, FYN, GAB2, GBP1, GBP2, GBP4, GBP5, GBP6, GBP7, GRB2, HCK, HERC5, HGF, HLA-A, HLA-B, HLA-C, HLA-DPA1, HLA-DPB1, HLA-DQA1, HLA-DQA2, HLA-DRB1, HLA-DRB5,…
Glycolysis	23	5	5.3	4.27	0.0021	0.017	6.54	1.89	18.3		C2	ENO1, GPI, PFKFB2, PFKFB4, PFKP	ALDOA, ALDOC, ENO1, ENO2, ENO3, GAPDH, GPI, PFKFB2, PFKFB3, PFKFB4, PFKL, PFKM, PFKP, PGAM1, PGK1, PKM, PPP2CA, PPP2CB, PPP2R1A, PPP2R1B, PPP2R5D, TPI1, TPI1P1
Transport of inorganic cations/anions and amino acids/oligopeptides	52	7	3.28	3.41	0.0051	0.028	3.67	1.39	8.24		C2	SLC12A4, SLC1A3, SLC1A4, SLC20A1, SLC26A6, SLC36A1, SLC7A8	SLC12A2, SLC12A4, SLC12A6, SLC12A7, SLC15A2, SLC15A3, SLC15A4, SLC16A10, SLC17A5, SLC17A7, SLC1A2, SLC1A3, SLC1A4, SLC1A5, SLC20A1, SLC20A2, SLC24A1, SLC24A3, SLC24A4, SLC25A10, SLC26A2, SLC26A4, SLC26A6, SLC26A9, SLC36A1, SLC38A1, SLC38A2, SLC38A5, SLC3A2, SLC43A1, SLC43A2, SLC4A2, SLC4A4, SLC4A7, SLC4A8, SLC6A12, SLC6A6, SLC7A1, SLC7A11, SLC7A5, SLC7A6, SLC7A7, SLC7A8, SLC8A1, SLC8B1, SLC9A1, S…
Transmembrane transport of small molecules	240	19	1.93	3	0.0048	0.028	2.04	1.2	3.3		C2	ABCC5, ATP6V0A2, ATP6V1F, ATP6V1H, ATP9A, CP, GNG12, NUP107, SLC12A4, SLC1A3, SLC1A4, SLC20A1, SLC22A15, SLC26A6, SLC29A1, SLC36A1, SLC39A3, SLC44A1, SLC7A8	AAAS, ABCA2, ABCA3, ABCA6, ABCA7, ABCB1, ABCB10, ABCC1, ABCC11, ABCC2, ABCC3, ABCC4, ABCC5, ABCC6, ABCD1, ABCD2, ABCD3, ABCG1, ABCG2, ADCY3, ADCY4, ADCY6, ADCY7, ADCY9, AQP3, AQP9, ARHGEF9, ATP10A, ATP10D, ATP11A, ATP11B, ATP11C, ATP1A1, ATP1B1, ATP1B2, ATP1B3, ATP2A2, ATP2A3, ATP2C1, ATP6V0A2, ATP6V0B, ATP6V0C, ATP6V0D1, ATP6V0D2, ATP6V0E1, ATP6V1A, ATP6V1B2, ATP6V1C1, ATP6V1C2, ATP6V1D, ATP6V1E…
Signaling by Insulin receptor	77	8	2.53	2.79	0.013	0.061	2.73	1.13	5.73		C2	ATP6V0A2, ATP6V1F, ATP6V1H, GRB10, PIK3CB, PIK3R4, PRKAB2, RPTOR	AKT2, ATP6V0A2, ATP6V0B, ATP6V0C, ATP6V0D1, ATP6V0D2, ATP6V0E1, ATP6V1A, ATP6V1B2, ATP6V1C1, ATP6V1C2, ATP6V1D, ATP6V1E1, ATP6V1E2, ATP6V1F, ATP6V1G1, ATP6V1G2, ATP6V1H, CAB39, CAB39L, CDK1, CRK, DOK1, EEF2K, EIF4B, EIF4E, EIF4EBP1, EIF4G1, FGF2, FGF9, FGFR1, FRS2, GAB1, GRB10, GRB2, HRAS, INSR, IRS1, IRS2, KL, KRAS, MAP2K1, MAP2K2, MAPK1, MAPK3, MLST8, MTOR, NRAS, PDE3B, PDPK1, PIK3C3, PIK3CA, P…
Sphingolipid metabolism	52	6	2.81	2.71	0.019	0.08	3.07	1.07	7.24		C2	ARSB, ASAH1, SGPP1, SGPP2, SPHK1, UGCG	ACER2, ACER3, ARSA, ARSB, ARSG, ARSK, ASAH1, ASAH2, CERK, CERS2, CERS4, CERS5, CERS6, CSNK1G2, CTSA, DEGS1, GALC, GBA, GBA2, GLA, GLB1, GM2A, HEXA, HEXB, KDSR, NEU1, NEU3, NEU4, OSBP, PLPP1, PLPP3, PPM1L, PSAP, SGMS1, SGMS2, SGPL1, SGPP1, SGPP2, SMPD1, SMPD2, SMPD3, SMPD4, SPHK1, SPHK2, SPTLC1, SPTLC2, STS, SUMF1, SUMF2, UGCG, VAPA, VAPB
Glucose metabolism	54	6	2.71	2.6	0.023	0.081	2.94	1.02	6.92		C2	ENO1, GPI, PFKFB2, PFKFB4, PFKP, PHKA2	AGL, ALDOA, ALDOC, CALM1, CALM2, CALM3, ENO1, ENO2, ENO3, FBP1, GAPDH, GBE1, GOT1, GOT2, GPI, GYG1, GYS1, MDH1, MDH2, PC, PCK2, PFKFB2, PFKFB3, PFKFB4, PFKL, PFKM, PFKP, PGAM1, PGK1, PGM1, PGM2, PHKA2, PHKB, PHKG1, PHKG2, PKM, PPP2CA, PPP2CB, PPP2R1A, PPP2R1B, PPP2R5D, PRKACA, PRKACB, PYGB, PYGL, PYGM, SLC25A1, SLC25A10, SLC25A11, SLC25A12, SLC25A13, TPI1, TPI1P1, UGP2
Response to elevated platelet cytosolic Ca2+	68	7	2.51	2.58	0.021	0.081	2.7	1.04	5.95		C2	CLU, HABP4, ITGA2B, PROS1, SPARC, SRGN, TUBA4A	A2M, ABCC4, ACTN1, ACTN2, ACTN4, ALDOA, APP, BRPF3, CALM1, CALM2, CALM3, CALU, CAP1, CD36, CD63, CD9, CFD, CFL1, CLU, EGF, F13A1, F5, F8, FN1, HABP4, HGF, HSPA5, ITGA2B, ITGB3, LAMP2, MMRN1, PDGFA, PDGFB, PECAM1, PF4, PFN1, PLEK, PPBP, PPIA, PPIAP22, PRKCA, PRKCB, PROS1, PSAP, SCG3, SELP, SERPINA1, SERPINE1, SERPINF2, SERPING1, SOD1, SPARC, SRGN, STX4, STXBP3, TGFB1, TGFB3, THBS1, TIMP1, TLN1, TM…
Cell junction organization	45	5	2.71	2.37	0.036	0.11	2.94	0.901	7.48		C2	CADM1, FBLIM1, FERMT2, LAMA3, PARVB	ACTN1, ARHGEF6, CADM1, CD151, CDH1, CDH24, CDH5, CDH6, CLDN12, CLDN14, CLDN15, CLDN4, CLDN5, CLDN7, CTNNA1, CTNNB1, CTNND1, F11R, FBLIM1, FERMT2, ILK, ITGB1, ITGB4, JUP, LAMA3, LAMB3, LAMC2, LIMS1, MPP5, NECTIN1, NECTIN2, NECTIN3, NECTIN4, PARD3, PARD6A, PARD6B, PARD6G, PARVB, PATJ, PLEC, PRKCI, PVR, RSU1, TESK1, VASP
Glycerophospholipid biosynthesis	62	6	2.36	2.22	0.041	0.11	2.52	0.883	5.87		C2	GPAT4, GPCPD1, GPD1L, MGLL, PLD6, SLC44A1	ACHE, AGPAT1, AGPAT2, AGPAT3, AGPAT4, AGPAT5, CDIPT, CDS1, CDS2, CEPT1, CHKA, CHPT1, CRLS1, DGAT1, DGAT2, ETNK1, ETNK2, GNPAT, GPAM, GPAT2, GPAT3, GPAT4, GPCPD1, GPD1L, HADHA, HADHB, LCLAT1, LPCAT1, LPCAT2, LPCAT3, LPCAT4, LPGAT1, LPIN1, LPIN2, MBOAT1, MBOAT2, MBOAT7, MGLL, PCYT1A, PCYT2, PEMT, PGS1, PHOSPHO1, PITPNB, PLA2G12A, PLA2G4A, PLA2G4C, PLA2G6, PLBD1, PLD1, PLD2, PLD3, PLD4, PLD6, PNPLA2…
Cell-Cell communication	78	7	2.19	2.17	0.041	0.11	2.32	0.896	5.06		C2	CADM1, FBLIM1, FERMT2, LAMA3, MAPK11, PARVB, PIK3CB	ACTN1, ACTN2, ACTN4, ARHGEF6, CADM1, CD151, CD2AP, CD47, CDH1, CDH24, CDH5, CDH6, CLDN12, CLDN14, CLDN15, CLDN4, CLDN5, CLDN7, CTNNA1, CTNNB1, CTNND1, F11R, FBLIM1, FERMT2, FYN, GRB2, ILK, IQGAP1, ITGB1, ITGB4, JUP, LAMA3, LAMB3, LAMC2, LIMS1, MAGI2, MAPK11, MAPK12, MAPK13, MAPK14, MAPK8, MPP5, NCK1, NCK2, NECTIN1, NECTIN2, NECTIN3, NECTIN4, NTN1, PAK1, PARD3, PARD6A, PARD6B, PARD6G, PARVB, PATJ,…
Platelet activation, signaling and aggregation	162	12	1.8	2.13	0.035	0.11	1.89	0.948	3.42		C2	CLU, GNG12, GP1BA, GP9, HABP4, ITGA2B, MGLL, PIK3CB, PROS1, SPARC, SRGN, TUBA4A	A2M, ABCC4, ACTN1, ACTN2, ACTN4, AKT1, AKT2, AKT3, ALDOA, APBB1IP, APP, ARRB1, ARRB2, BCAR1, BRPF3, CALM1, CALM2, CALM3, CALU, CAP1, CD36, CD63, CD9, CDC42, CFD, CFL1, CLU, COL1A1, COL1A2, CRK, CSK, DAGLA, DAGLB, DGKA, DGKD, DGKE, DGKG, DGKH, DGKQ, EGF, F13A1, F2R, F5, F8, FCER1G, FN1, FYN, GNA11, GNA12, GNA13, GNA15, GNAI1, GNAI2, GNAI3, GNAQ, GNB1, GNB2, GNB4, GNB5, GNG11, GNG12, GNG2, GNG4, GN…
Metabolism of carbohydrates	179	13	1.77	2.14	0.033	0.11	1.85	0.958	3.28		C2	ABCC5, ARSB, B3GNT7, CHST3, ENO1, GPI, NUP107, PFKFB2, PFKFB4, PFKP, PGD, PHKA2, TALDO1	AAAS, ABCC5, AGL, AGRN, ALDOA, ALDOC, AMY2B, ARSB, B3GALT6, B3GAT1, B3GAT2, B3GAT3, B3GNT2, B3GNT4, B3GNT7, B4GALT1, B4GALT2, B4GALT3, B4GALT4, B4GALT5, B4GALT6, B4GALT7, B4GAT1, CALM1, CALM2, CALM3, CD44, CHPF, CHPF2, CHST11, CHST12, CHST13, CHST14, CHST15, CHST2, CHST3, CHST7, CHSY1, CSGALNACT1, CSGALNACT2, CSPG4, DSE, ENO1, ENO2, ENO3, EXT1, EXT2, FBP1, G6PC3, G6PD, GALE, GALK1, GALT, GAPDH, G…
Biological oxidations	55	5	2.21	1.87	0.074	0.17	2.35	0.728	5.88		C2	CYP27A1, GCLC, GCLM, GSTO2, MAOA	ACSS1, ACSS2, AHCY, ALDH1A1, ALDH2, BPNT1, CNDP2, COMT, CYP19A1, CYP1A1, CYP1B1, CYP24A1, CYP27A1, CYP27B1, CYP2J2, CYP2R1, CYP2S1, CYP2U1, CYP3A5, CYP51A1, GCLC, GCLM, GGCT, GGT5, GGT7, GSS, GSTA4, GSTM1, GSTM4, GSTO1, GSTO2, GSTP1, MAOA, MAT2A, MAT2B, MGST1, MGST2, MGST3, MTR, NAT1, OPLAH, PAOX, PAPSS1, PAPSS2, POMC, PTGS1, PTGS2, SLC35D1, SMOX, SULT1A1, SULT1B1, TBXAS1, TPMT, UGDH, UGP2
Peptide ligand-binding receptors	71	6	2.06	1.85	0.071	0.17	2.17	0.764	5.01		C2	CCL2, CCL7, CXCL10, CXCL11, HCRTR1, SSTR2	ACKR3, ANXA1, APP, C3, C3AR1, C5, C5AR1, C5AR2, CCL2, CCL20, CCL22, CCL28, CCL3, CCL3L3, CCL4, CCL5, CCL7, CCR1, CCR10, CCR2, CCR3, CCR4, CCR5, CCR7, CX3CR1, CXCL1, CXCL10, CXCL11, CXCL12, CXCL13, CXCL16, CXCL2, CXCL3, CXCL5, CXCL6, CXCL8, CXCL9, CXCR1, CXCR2, CXCR3, CXCR4, CXCR5, CXCR6, EDN1, EDNRB, F2R, F2RL1, FPR1, FPR2, FPR3, GPER1, GRPR, HCRTR1, HEBP1, KISS1R, MC1R, NMB, NMUR1, NTSR1, OPRL1,…
Fatty acid, triacylglycerol, and ketone body metabolism	144	10	1.69	1.73	0.073	0.17	1.76	0.819	3.36		C2	ANKRD1, CDK8, ELOVL7, GPAT4, GPD1L, ME1, MED27, PCCB, PRKAB2, TXNRD1	ABCA1, ABCB4, ACACA, ACACB, ACADM, ACADS, ACADVL, ACAT1, ACLY, ACOX1, ACSL1, ACSL3, ACSL4, ACSL5, ACSL6, AGPAT1, AGPAT2, AGPAT3, AGPAT4, AGPAT5, ALAS1, ANGPTL4, ANKRD1, ARNTL, BDH1, CCNC, CD36, CDK19, CDK8, CLOCK, CPT1A, CPT2, CREBBP, CYP1A1, DECR1, DGAT1, DGAT2, ECHS1, ECI1, ELOVL1, ELOVL3, ELOVL5, ELOVL6, ELOVL7, EP300, ESRRA, FADS1, FASN, FDFT1, FHL2, G0S2, GK, GLIPR1, GPAM, GPAT2, GPAT3, GPAT…
Developmental Biology	272	16	1.43	1.49	0.095	0.2	1.47	0.824	2.46		C2	ABLIM3, CDK8, CLTA, COL6A1, DOCK1, EBF1, GFRA2, ITGA2B, LAMB1, MAPK11, MED27, MYL9, NCAM1, PCSK6, SCN1B, SEMA4D	ABL1, ABL2, ABLIM1, ABLIM3, ACVR1B, ACVR1C, ACVR2A, ACVR2B, AGRN, AKT1, AKT2, AKT3, ALCAM, ANGPTL4, ANK1, ANK3, AP2A1, AP2A2, AP2B1, AP2M1, AP2S1, ARHGAP35, ARHGEF11, ARHGEF12, BNIP2, BORCS8, CACNA1G, CACNA1I, CACNB1, CACNB3, CAP1, CCNC, CCND3, CD24, CD36, CD72, CDC42, CDK1, CDK19, CDK4, CDK5, CDK5R1, CDK8, CEBPB, CEBPD, CFL1, CLASP1, CLTA, CLTC, COL1A1, COL1A2, COL4A2, COL5A1, COL6A1, COL6A2, CO…
L1CAM interactions	61	5	2	1.61	0.1	0.21	2.1	0.652	5.22		C2	CLTA, ITGA2B, LAMB1, NCAM1, SCN1B	ALCAM, ANK1, ANK3, AP2A1, AP2A2, AP2B1, AP2M1, AP2S1, CD24, CLTA, CLTC, CSNK2A1, CSNK2A2, CSNK2B, DLG1, DLG3, DNM1, DNM2, DPYSL2, EZR, FGFR1, ITGA1, ITGA2, ITGA2B, ITGA5, ITGA9, ITGAV, ITGB1, ITGB3, L1CAM, LAMB1, LAMC1, MAP2K1, MAP2K2, MAPK1, MAPK3, MSN, NCAM1, NRCAM, NRP1, NRP2, NUMB, PAK1, RAC1, RANBP9, RDX, RPS6KA1, RPS6KA2, RPS6KA3, RPS6KA4, RPS6KA5, SCN1B, SCN8A, SDCBP, SHTN1, SPTA1, SPTAN1,…
Metabolism of amino acids and derivatives	140	9	1.57	1.39	0.12	0.23	1.61	0.718	3.18		C2	GCLC, GCLM, NQO1, PHGDH, PSAT1, QDPR, SLC6A8, SRM, TDO2	AASS, ACAD8, ACADSB, ACAT1, ADI1, AFMID, AGMAT, AHCY, ALDH18A1, ALDH4A1, ALDH6A1, ALDH7A1, ALDH9A1, AMD1, AMDHD1, APIP, ARG2, ASL, AUH, AZIN1, AZIN2, BCAT1, BCAT2, BCKDHB, CBS, CKB, CNDP2, CSAD, CTH, DBT, DLD, DLST, ENOPH1, ETHE1, FAH, GAMT, GATM, GCDH, GCLC, GCLM, GLS, GLS2, GLUD1, GLUL, GOT1, GOT2, GPT2, GRHPR, GSTZ1, HAAO, HAL, HIBADH, HIBCH, HPD, HSD17B10, IDO1, IDO2, INHBA, INHBB, IVD, KMO, …
Neuronal System	142	9	1.54	1.35	0.13	0.23	1.59	0.708	3.13		C2	CHRNE, EPB41L1, GNG12, KCNK6, MAOA, MYO6, NCALD, SLC1A3, STX16	ABAT, ACHE, ACTN2, ADCY3, ADCY4, ADCY6, ADCY7, ADCY9, AKAP5, AKAP9, ALDH2, ALDH5A1, AP2A1, AP2A2, AP2B1, AP2M1, AP2S1, ARHGEF9, BRAF, CACNA1A, CACNA2D3, CACNB1, CACNB3, CALM1, CALM2, CALM3, CAMK2D, CAMK4, CAMKK1, CHRFAM7A, CHRNA5, CHRNA7, CHRNE, COMT, CREB1, DLG1, DLG3, DNAJC5, EPB41L1, GABBR1, GABRR2, GAD1, GLS, GLS2, GLUL, GNAI1, GNAI2, GNAI3, GNAL, GNB1, GNB2, GNB4, GNB5, GNG11, GNG12, GNG2, G…
Immune System	768	38	1.21	1.21	0.13	0.23	1.23	0.855	1.73		C2	ACTR1B, C1QA, C1QC, CBL, CD86, CHUK, CLTA, CUL2, DDX58, FBXW7, FCGR2B, FLNB, HERC5, IFI27, IFI6, IFITM2, IFITM3, IL1RN, IRF9, KLHL20, KPNA2, KPNA3, LGALS3, LGMN, MAPK11, MX1, NCAM1, NLRP3, NUP107, OAS2, OAS3, PIK3CB, PIK3R4, PROS1, REL, TRIM37, USP18, YES1	AAAS, ACTR1A, ACTR1B, ADAM17, ADAR, AGER, AIM2, AKT1, AKT1S1, AKT2, AKT3, ANAPC1, ANAPC10, ANAPC11, ANAPC13, ANAPC2, ANAPC4, ANAPC5, ANAPC7, AP1B1, AP1G1, AP1M1, AP1S1, AP1S2, AP2A1, AP2A2, AP2B1, AP2M1, AP2S1, APP, ARF1, ARIH1, ARIH2, ASB1, ASB13, ASB2, ASB3, ASB6, ASB7, ASB8, ATF1, ATF2, ATG12, ATG5, ATG7, B2M, BAD, BCL10, BCL2, BCL2L1, BIRC2, BIRC3, BLK, BLMH, BLNK, BTK, BTLA, BTRC, C1QA, C1QB…
Signaling by SCF-KIT	72	5	1.69	1.22	0.17	0.28	1.75	0.548	4.31		C2	CBL, CHUK, GRB10, KITLG, YES1	AKT1, AKT1S1, AKT2, AKT3, BAD, CASP9, CBL, CDK1, CDKN1A, CDKN1B, CHEK1, CHUK, CREB1, FER, FES, FOXO1, FOXO3, FOXO4, FYN, GAB2, GRAP, GRAP2, GRB10, GRB2, GSK3A, HRAS, JAK2, KIT, KITLG, KRAS, LCK, LYN, MAP2K1, MAP2K2, MAPK1, MAPK3, MAPKAP1, MDM2, MLST8, MMP9, MTOR, NR4A1, NRAS, PDPK1, PHLPP1, PIK3CA, PIK3R1, PIK3R3, PRKCA, PTEN, PTPN6, RAC1, RAF1, RICTOR, RPS6KB2, SH2B2, SH2B3, SOCS1, SOCS6, SOS1, …
Innate Immune System	196	11	1.37	1.07	0.18	0.28	1.4	0.681	2.58		C2	C1QA, C1QC, CHUK, DDX58, HERC5, LGALS3, LGMN, MAPK11, NLRP3, PIK3R4, PROS1	AGER, AIM2, APP, ATF1, ATF2, ATG12, ATG5, BCL2, BCL2L1, BIRC2, BIRC3, BTK, C1QA, C1QB, C1QC, C1S, C2, C3, C4A, C5, CAPZA1, CAPZA2, CARD9, CASP1, CASP10, CASP2, CASP4, CASP8, CASP9, CCR2, CD14, CD180, CD4, CD46, CD55, CDK1, CFB, CFD, CFH, CHUK, CNPY3, CR1, CREB1, CREBBP, CTSB, CTSK, CTSL, CTSS, CYLD, DDOST, DDX58, DEFB1, DHX58, DNM1, DNM2, DUSP3, DUSP4, DUSP6, DUSP7, ECSIT, EEA1, ELK1, EP300, FADD…
Class A/1 (Rhodopsin-like receptors)	121	7	1.41	0.936	0.23	0.33	1.44	0.563	3.08		C2	ADRB1, CCL2, CCL7, CXCL10, CXCL11, HCRTR1, SSTR2	ACKR3, ADORA2A, ADORA2B, ADORA3, ADRB1, ADRB2, ANXA1, APP, C3, C3AR1, C5, C5AR1, C5AR2, CCL2, CCL20, CCL22, CCL28, CCL3, CCL3L3, CCL4, CCL5, CCL7, CCR1, CCR10, CCR2, CCR3, CCR4, CCR5, CCR7, CNR1, CNR2, CX3CR1, CXCL1, CXCL10, CXCL11, CXCL12, CXCL13, CXCL16, CXCL2, CXCL3, CXCL5, CXCL6, CXCL8, CXCL9, CXCR1, CXCR2, CXCR3, CXCR4, CXCR5, CXCR6, CYSLTR1, CYSLTR2, EDN1, EDNRB, F2R, F2RL1, FFAR2, FFAR3, F…
Post-translational protein modification	141	8	1.38	0.944	0.22	0.33	1.41	0.594	2.88		C2	ARSB, B3GNT7, B3GNTL1, DOLK, EIF5A2, GALNT10, PIGW, PROS1	ALG1, ALG10, ALG10B, ALG11, ALG12, ALG13, ALG14, ALG2, ALG3, ALG5, ALG6, ALG8, ALG9, ARSA, ARSB, ARSG, ARSK, B3GNT2, B3GNT4, B3GNT5, B3GNT7, B3GNT8, B3GNT9, B3GNTL1, B4GALT1, B4GALT2, B4GALT3, B4GALT4, B4GALT5, B4GALT6, C1GALT1, C1GALT1C1, CALR, CANX, DAD1, DDOST, DHPS, DOHH, DOLK, DOLPP1, DPAGT1, DPM1, DPM2, DPM3, EDEM1, EDEM2, EDEM3, EIF5A, EIF5A2, FURIN, FUT8, GALNT1, GALNT10, GALNT11, GALNT12…
Diabetes pathways	107	6	1.37	0.786	0.28	0.38	1.39	0.497	3.16		C2	CCL2, DCP2, EXTL3, IGF2BP3, PLA2G7, SEC11C	ACADVL, ADD1, ARFGAP1, ATF3, ATF4, ATF4P3, ATF6, ATP6V0D1, CALR, CCL2, CTDSP2, CUL7, CXCL8, CXXC1, DCP2, DCTN1, DDIT3, DDX11, DDX12P, DIS3, DNAJB11, DNAJB9, DNAJC3, EDEM1, EIF2AK3, EIF2S1, ERN1, ERO1A, EXOC1, EXOC2, EXOC3, EXOC4, EXOC5, EXOC6, EXOC8, EXOSC1, EXOSC2, EXOSC3, EXOSC4, EXOSC5, EXOSC6, EXOSC7, EXOSC8, EXOSC9, EXTL3, FKBP14, GOSR2, GSK3A, HDGF, HERPUD1, HSP90B1, HSPA5, HYOU1, IGF2BP1, …
Signaling by NOTCH	93	5	1.31	0.62	0.33	0.44	1.33	0.42	3.24		C2	AGO1, CCND1, CDK8, DLL1, FBXW7	ADAM10, ADAM17, AGO1, AGO2, AGO3, AGO4, APH1A, APH1B, ARRB1, ARRB2, ATP2A2, ATP2A3, B4GALT1, CCNC, CCND1, CDK8, CREBBP, CUL1, DLL1, DNER, DTX1, DTX2, DTX4, E2F1, E2F3, EP300, FBXW7, FURIN, HDAC1, HDAC10, HDAC11, HDAC2, HDAC3, HDAC4, HDAC5, HDAC6, HDAC7, HDAC8, HDAC9, HES1, HEY1, HIF1A, JAG1, JAG2, JUN, KAT2A, KAT2B, LFNG, MAML1, MAML2, MAML3, MAMLD1, MFNG, MIB1, MIB2, MOV10, MYC, NCOR1, NCOR2, NC…
GPCR ligand binding	162	8	1.2	0.538	0.35	0.45	1.22	0.513	2.47		C2	ADRB1, CCL2, CCL7, CXCL10, CXCL11, GNG12, HCRTR1, SSTR2	ACKR3, ADGRE1, ADGRE2, ADGRE3, ADGRE5, ADM, ADM2, ADORA2A, ADORA2B, ADORA3, ADRB1, ADRB2, ANXA1, APP, C3, C3AR1, C5, C5AR1, C5AR2, CALCRL, CCL2, CCL20, CCL22, CCL28, CCL3, CCL3L3, CCL4, CCL5, CCL7, CCR1, CCR10, CCR2, CCR3, CCR4, CCR5, CCR7, CD55, CNR1, CNR2, CX3CR1, CXCL1, CXCL10, CXCL11, CXCL12, CXCL13, CXCL16, CXCL2, CXCL3, CXCL5, CXCL6, CXCL8, CXCL9, CXCR1, CXCR2, CXCR3, CXCR4, CXCR5, CXCR6, C…
Signaling by Interleukins	99	5	1.23	0.476	0.38	0.48	1.24	0.393	3.03		C2	CBL, CHUK, IL1RN, PIK3CB, YES1	BLNK, BTRC, CASP1, CBL, CDK1, CHUK, CRK, CRKL, CSF2, CSF2RA, CSF2RB, CUL1, FYN, GAB2, GRB2, HCK, HGF, HRAS, IKBKB, IKBKG, IL18, IL1A, IL1B, IL1R1, IL1R2, IL1RAP, IL1RN, IL2RA, IL2RB, IL2RG, IL3RA, IL6, IL6R, IL6ST, IL7, IL7R, INPPL1, IRAK1, IRAK2, IRAK3, JAK1, JAK2, JAK3, KRAS, LCK, LYN, MAP2K1, MAP2K2, MAP2K4, MAP2K6, MAP3K3, MAP3K7, MAP3K8, MAPK1, MAPK3, MYD88, NFKB2, NOD1, NOD2, NRAS, PELI1, P…
Hemostasis	338	15	1.08	0.312	0.42	0.51	1.09	0.597	1.84		C2	CLU, DOCK1, GNG12, GP1BA, GP9, HABP4, ITGA2B, MGLL, PIK3CB, PROS1, SLC7A8, SPARC, SRGN, TUBA4A, YES1	A2M, ABCC4, ABL1, ACTN1, ACTN2, ACTN4, AK3, AKAP1, AKAP10, AKT1, AKT2, AKT3, ALDOA, ANGPT1, APBB1IP, APP, ARRB1, ARRB2, ATP1B1, ATP1B2, ATP1B3, ATP2A2, ATP2A3, BCAR1, BRPF3, BSG, C1QBP, CABLES1, CABLES2, CALM1, CALM2, CALM3, CALU, CAP1, CAPZA1, CAPZA2, CAV1, CBX5, CD2, CD36, CD47, CD48, CD58, CD63, CD9, CDC42, CDK2, CDK5, CFD, CFL1, CLU, COL1A1, COL1A2, CREBBP, CRK, CSK, DAGLA, DAGLB, DGKA, DGKD,…
Metabolism of proteins	385	14	0.886	-0.47	0.72	0.85	0.879	0.472	1.51		C2	ARSB, B3GNT7, B3GNTL1, DOLK, EIF5A2, FBXW7, GALNT10, HSCB, PIGW, PROS1, RPL10P16, SEC11C, SPHK1, TUBA4A	ACO2, ACTB, ALG1, ALG10, ALG10B, ALG11, ALG12, ALG13, ALG14, ALG2, ALG3, ALG5, ALG6, ALG8, ALG9, AP3M1, ARFGEF2, ARSA, ARSB, ARSG, ARSK, B3GNT2, B3GNT4, B3GNT5, B3GNT7, B3GNT8, B3GNT9, B3GNTL1, B4GALT1, B4GALT2, B4GALT3, B4GALT4, B4GALT5, B4GALT6, BCS1L, C1GALT1, C1GALT1C1, CALR, CANX, CCT2, CCT3, CCT4, CCT5, CCT6A, CCT7, CCT8, CHCHD4, COQ2, COX17, CS, CYC1, DAD1, DDOST, DHPS, DNAJC19, DOHH, DOLK…
Cell Cycle, Mitotic	294	9	0.746	-0.912	0.86	0.93	0.734	0.33	1.42		C2	BUB1, CCND1, DSN1, LIN52, MYBL2, NUP107, PCNA, POLD4, TUBA4A	ACTR1A, AHCTF1, AKAP9, ALMS1, ANAPC1, ANAPC10, ANAPC11, ANAPC2, ANAPC4, ANAPC5, ANAPC7, AURKA, AURKB, B9D2, BIRC5, BTRC, BUB1, BUB3, CCNA1, CCNA2, CCNB1, CCNB2, CCND1, CCND2, CCND3, CCNE1, CCNE2, CCNH, CDC14A, CDC16, CDC20, CDC23, CDC25A, CDC25B, CDC26, CDC27, CDC6, CDC7, CDCA8, CDK1, CDK2, CDK4, CDK5RAP2, CDK6, CDK7, CDKN1A, CDKN1B, CDKN2A, CDKN2B, CDKN2C, CDKN2D, CDT1, CENPA, CENPC, CENPH, CENP…
Adaptive Immune System	467	14	0.73	-1.23	0.92	0.93	0.715	0.385	1.22		C2	ACTR1B, CBL, CD86, CHUK, CLTA, CUL2, FBXW7, FCGR2B, KLHL20, LGMN, PIK3CB, REL, TRIM37, YES1	ACTR1A, ACTR1B, AKT1, AKT1S1, AKT2, AKT3, ANAPC1, ANAPC10, ANAPC11, ANAPC13, ANAPC2, ANAPC4, ANAPC5, ANAPC7, AP1B1, AP1G1, AP1M1, AP1S1, AP1S2, AP2A1, AP2A2, AP2B1, AP2M1, AP2S1, ARF1, ARIH2, ASB1, ASB13, ASB2, ASB3, ASB6, ASB7, ASB8, ATG7, B2M, BAD, BCL10, BLK, BLMH, BLNK, BTK, BTLA, BTRC, C3, CALM1, CALM2, CALM3, CALR, CANX, CARD11, CASP9, CBL, CBLB, CD19, CD200R1, CD226, CD247, CD274, CD28, CD…
GPCR downstream signaling	238	7	0.717	-0.913	0.86	0.93	0.704	0.279	1.48		C2	ADRB1, CXCL10, CXCL11, GNG12, HCRTR1, MGLL, SSTR2	ABR, ACKR3, ADCY3, ADCY4, ADCY6, ADCY7, ADCY9, ADM, ADM2, ADORA2A, ADORA2B, ADORA3, ADRB1, ADRB2, AKAP13, AKT1, AKT2, AKT3, ANXA1, APP, ARHGAP4, ARHGEF1, ARHGEF11, ARHGEF12, ARHGEF17, ARHGEF18, ARHGEF2, ARHGEF3, ARHGEF6, ARHGEF9, C3, C3AR1, C5, C5AR1, CALCRL, CCL20, CCL28, CCL5, CCR1, CCR10, CCR2, CCR3, CCR4, CCR5, CCR7, CDC42, CNR1, CNR2, CXCL1, CXCL10, CXCL11, CXCL12, CXCL13, CXCL16, CXCL2, CXC…
Signaling by GPCR	307	9	0.714	-1.05	0.89	0.93	0.701	0.316	1.36		C2	ADRB1, CCL2, CCL7, CXCL10, CXCL11, GNG12, HCRTR1, MGLL, SSTR2	ABR, ACKR3, ADCY3, ADCY4, ADCY6, ADCY7, ADCY9, ADGRE1, ADGRE2, ADGRE3, ADGRE5, ADM, ADM2, ADORA2A, ADORA2B, ADORA3, ADRB1, ADRB2, AKAP13, AKT1, AKT2, AKT3, ANXA1, APP, ARHGAP4, ARHGEF1, ARHGEF11, ARHGEF12, ARHGEF17, ARHGEF18, ARHGEF2, ARHGEF3, ARHGEF6, ARHGEF9, C3, C3AR1, C5, C5AR1, C5AR2, CALCRL, CALM1, CALM2, CALM3, CAMK4, CCL2, CCL20, CCL22, CCL28, CCL3, CCL3L3, CCL4, CCL5, CCL7, CCR1, CCR10, …
DNA Replication	177	5	0.688	-0.864	0.86	0.93	0.676	0.216	1.62		C2	BUB1, DSN1, NUP107, PCNA, POLD4	AHCTF1, AURKB, B9D2, BIRC5, BUB1, BUB3, CCNA1, CCNA2, CDC20, CDC6, CDC7, CDCA8, CDK2, CDKN1A, CDKN1B, CDT1, CENPA, CENPC, CENPH, CENPI, CENPK, CENPL, CENPM, CENPN, CENPO, CENPP, CENPQ, CENPS, CENPT, CENPU, CKAP5, CLASP1, CLIP1, DBF4, DNA2, DSN1, E2F1, E2F2, E2F3, FBXO5, FEN1, GINS1, GINS2, GINS4, GMNN, GORASP1, INCENP, ITGB3BP, KIF18A, KIF23, KIF2A, KIF2C, KNL1, KNTC1, LIG1, MAD1L1, MAD2L1, MAPRE…
Signalling by NGF	186	5	0.655	-0.98	0.88	0.93	0.642	0.205	1.54		C2	CHUK, CLTA, MAPK11, PCSK6, PIK3CB	AATF, ABR, ADAM17, ADCY3, ADCY4, ADCY6, ADCY7, ADCY9, ADORA2A, AKAP13, AKT1, AKT1S1, AKT2, AKT3, AP2A1, AP2A2, AP2B1, AP2M1, AP2S1, APH1A, APH1B, ARHGAP4, ARHGDIA, ARHGEF1, ARHGEF11, ARHGEF12, ARHGEF17, ARHGEF18, ARHGEF2, ARHGEF3, ARHGEF6, ARHGEF9, ATF1, BAD, BCL2L11, BEX3, BRAF, CALM1, CALM2, CALM3, CAMK4, CASP2, CASP3, CASP9, CDK1, CDKN1A, CDKN1B, CHUK, CLTA, CLTC, CREB1, CRK, DNAL4, DNM1, DNM2…
Generic Transcription Pathway	298	8	0.654	-1.25	0.93	0.93	0.639	0.272	1.29		C2	CDK8, MED27, NR1H3, THRA, ZKSCAN1, ZNF431, ZNF433, ZNF558	CCNC, CCNT1, CCNT2, CDK8, CDK9, CDKN2B, CREBBP, E2F4, E2F5, ESR1, ESRRA, HDAC1, HELZ2, JUNB, KAT2A, KAT2B, MAML1, MAML2, MAML3, MAMLD1, MED1, MED10, MED12, MED14, MED15, MED16, MED17, MED20, MED23, MED24, MED25, MED26, MED27, MED30, MED31, MED4, MED6, MED7, MED8, MEN1, MYC, NCOA1, NCOA2, NCOA3, NCOA6, NCOR1, NCOR2, NOTCH2, NOTCH3, NOTCH4, NR1D1, NR1D2, NR1H2, NR1H3, NR2C2AP, NR2F6, NR3C1, NR3C2, …
